# Supplementary material for: Half-lives of PAHs and temporal microbiota changes in commonly used urban landscaping materials
Source: PeerJ. 2018 Mar 19;6:e4508. doi: 10.7717/peerj.4508 (PMC5863720; doi:10.7717/peerj.4508)
Supplement: Table S3 — Concentrations and recoveries for PAHs and surrogate standard recoveries. [file peerj-06-4508-s003.xlsx]

## Sheet: Half-lives and concentrations
Landscaping material	Half-live of Phenanthrene	Half-live of fluoranthene	Half-live of pyrene	Half-live of chrysene	Half-live of PAHs	Phenanthrene initial concentration ng/g	Phenanthrene ng/g week 4	Phenanthrene ng/g week 8	Phenanthrene ng/g week 12	Fluoranthene initial concentration ng/g	Fluoranthene ng/g week 4	Fluoranthene ng/g week 8	Fluoranthene ng/g week 12	Pyrene initial concentration ng/g	Pyrene ng/g week 4	Pyrene ng/g week 8	Pyrene ng/g week 12	Chrysene initial concentration ng/g (0 and 2 week are taken into account)	Chrysene week 0 concentration ng/g	Chrysene week 2 concentration ng/g	Chrysene ng/g week 4	Chrysene ng/g week 8	Chrysene ng/g week 12	Benzo[b]fluoranthene initial concentration ng/g (0 and 2 week are taken into account)	Benzo[b]fluoranthene week 0 concentration ng/g	Benzo[b]fluoranthene week 2 concentration ng/g	Benzo[b]fluoranthene ng/g week 4	Benzo[b]fluoranthene ng/g week 8	Benzo[b]fluoranthene ng/g week 12	Sum of PAHs ng/g initial concentration	Sum of PAHs ng/g week 4	Sum of PAHs ng/g week 8	Sum of PAHs ng/g week 12
Fine peat-sand 1	3.09	38.51	43.32	49.51	16.1197	703.848	246.614	123.583	48.306	664.329	649.795	645	489.619	775.513	772.17	751.253	585.672	321.688	337.097	306.278	279.511	293.932	275.478	494	366.632	621.671	503.367	406.194	323.739	2959.38	2451.46	2219.96	1722.81
Fine peat-sand 2	2.56	14,15*	16.91	46.21	11.3631	613.439	191.89	55.7864	28.448	627.552	449	490	330	673.089	500.78	489.419	431.08	281.535	337.097	225.973	257.146	262.019	232.224	452.87	366.632	539.137	396.11	332.638	317.096	2648.48	1794.93	1629.86	1338.85
Fine peat-sand 3	2.72	43.32	86.64	53.32	17.773	573.9	179.608	68.2286	29.8682	597.065	602.565	600.067	438.884	656.191	622	620.539	535.116	280.98	209.306	352.052	262.823	261	238.132	438.162	267.197	608.831	424.861	435.219	301.395	2546.3	2091.86	1985.05	1543.4
Fine peat-sand 4	2.72	34.66	34.66	57.76	17.773	573.98	221.821	147.882	41.7881	647	658.38	642	447.609	719	714.468	609.342	557.086	324.59	209.306	439.904	349	325.634	253.258	405.041	267.197	543.603	381.455	313.828	303.901	2669.61	2325.12	2038.69	1603.64
Fine peat-sand 5	2.65	38.51	77.02	38.51	17.3287	588	169.519	65.9259	28.8496	563	535.987	481.88	453.885	606	619.468	578.733	526.743	330.34	330.667	330.012	339.762	273.315	258.106	404.455	404.373	404.529	423.909	368.074	299.947	2491.79	2088.65	1767.93	1567.53
Coarse peat-sand 1	1.6	5.25	9.5	*	9.49517	519	22.6148	10.6131	6.08247	652.055	456.648	323.898	100.495	647.025	690.615	510.46	190.361	233.03	233.03	232.636	198.352	270.832	284.515	421.307	267.563	576.403	423.938	421.617	393.118	2472.42	1792.17	1537.42	974.571
Coarse peat-sand 2	1.65	2.76	5.33	24.76	6.08024	519	21.1376	12.3697	7.13291	652.055	153.193	56.2017	49.8481	647.025	567.927	217.882	124.101	233.99	233.03	233.986	162.991	187.681	180.044	424.184	267.563	581.356	444.21	404.051	355.082	2476.25	1349.46	878.186	716.209
Coarse peat-sand 3	1.46	2.39	4.01	26.66	5.45785	505	13.9815	6.94215	4.16915	623	143.481	43.0248	26.7811	643	441.315	127.132	85.2289	217	217.383	216.859	213.63	194.793	144.149	395.944	251.743	395.688	410.015	367.14	341.488	2383.94	1222.42	739.033	601.816
Coarse peat-sand 4	1.47	2.38	3.98	14.44	5.37323	505	81.28	5.90551	2.69753	623	229.88	37.7008	24.858	643	537.52	136.512	73.8642	217	217.383	217.556	204.184	146.969	116.87	407.244	251.743	562.759	398.15	382.805	352.117	2395.24	1451.01	709.892	570.407
Coarse peat-sand 5	1.42	2.09	4.13	22.3596	5.45785	512	8.90909	7.82727	3.71963	619.221	136.836	37.9	19.9346	634.608	506.573	139.664	82.2804	224.193	216.193	232.231	246.273	153.291	155.907	401.591	401.569	402.583	390.65	379.084	355.953	2391.61	1289.24	717.766	617.794
Gardening compost 1	2.5	26.66	16.5	46.21	14.1459	534	180.673	56.3	19.5843	624.38	625.61	495.95	452.64	599	599	417.5	345.888	347.365	196.32	498.42	329.074	310.783	284.854	469.298	284.23	654.38	472.798	384	361.798	2574.04	2207.16	1664.53	1464.76
Gardening compost 2	2.77	33.01	15.07	46.21	15.4033	534.06	178.846	49.5781	35.4646	589.618	588	524.062	428.424	618	618	498.234	301.162	332.012	196.32	467.7	295.308	300.711	280.374	476.894	284.23	669.5	513.55	450.312	395.414	2550.59	2193.7	1822.9	1440.84
Gardening compost 3	2.49	40.77	13.86	86.64	12.3776	760.087	160.527	66.4079	36.4118	643.154	642	601.645	491.271	736	599	488.276	409.212	289.473	269.663	309.276	269.663	266.5	270.529	500	382.375	617.962	432.455	362.868	388.235	2928.71	2103.65	1785.7	1595.66
Gardening compost 4	2.33	46.21	15.4	43.32	12.8361	760.09	198.759	63.6094	24.3977	710.05	703.793	537.266	504.466	736	674.966	574.422	388.432	351.572	269.663	433.468	343.702	325.207	285.977	500	382.375	617.617	510.861	473.016	409.716	3057.71	2432.08	1973.52	1612.99
Gardening compost 5	2.53	31.51	19.25	23104,91*	14.4406	682	220.218	52.3968	33.0482	701.145	700	537.524	556.506	715	715	506.667	458.289	304.162	246.587	361.727	307.664	297.159	305.494	461	361.11	561.106	456.692	379.238	353.747	2863.31	2399.57	1772.98	1707.08
Sandy gravel 1	1.42	4.18	3.12	77.02	7.96721	179.581	6.8254	4.56995	0.691099	437.177	129.048	153.067	13.8325	456.458	210.992	223.368	15.0681	288	288.296	287.922	274	261.653	263.445	328	328.069	435.375	319.698	324.244	291.419	1689.22	940.563	966.902	584.455
Sandy gravel 2	1.59	2.3	2.72	231.05	6.24457	179.581	11.5221	4.39894	1.54909	437.177	202.858	26.4096	12.96	456.458	350.77	68.7872	15.1418	155	288.296	155.202	150.522	165.66	141.662	328	328.069	513.823	323.23	314.761	265.247	1556.22	1038.9	580.016	436.56
Sandy gravel 3	1.48	1.6	2.19	7,07*	4.33217	252.586	2.35238	6.15707	2.25	801.867	266.667	20.3351	4.14352	762.025	529.99	107.225	8.79167	225.39	220.773	230.008	345.162	130.063	47.4722	331.345	291.379	371.311	434.114	352.835	271.556	2373.21	1578.29	616.615	334.213
Sandy gravel 4	1.37	2.03	1.92	138.63	5.02281	252.586	12.5913	1.98333	1.35204	801.867	197.626	52.5778	6.83673	762.025	324.243	80.3444	5.39796	221	220.773	173.081	229	183.217	223.888	298.927	291.379	306.474	358.278	327.121	295.964	2336.4	1121.74	645.243	533.439
Sandy gravel 5	1.56	3.63	3.57	346.57	8.55737	223.913	8.82407	3.88288	2.43966	612.465	270.352	136.36	32.3966	595.834	464.028	177.108	38.9483	346.032	346.071	172.415	321	347.599	342.897	378.634	452.593	304.675	415.148	423.098	439	2156.88	1479.35	1088.05	855.681
*=outlier

## Sheet: Recovery for added PAHs
Week 0	Phenanthrene	Fluoranthene	Pyrene	Chrysene	Benzo(b)fluoranthene
Fine peat-sand 1_2	139.11	128.351	139.204	112.366	122.211
Fine peat-sand 3_4	95.6423	89.6645	93.1476	69.7686	89.0658
Fine peat-sand 5	97.9389	93.8078	100.966	110.222	134.791
Fine peat-sand ctrl	0	0	0	0	0
Coarse peat-sand 1_2	86.4724	108.676	107.838	77.6767	89.1876
Coarse peat-sand 3_4	84.1067	103.82	107.179	72.461	83.9143
Coarse peat-sand 5	85.291	103.203	105.768	72.0645	133.856
Coarse peat-sand ctrl	0	0	0	0	0
Gardening compost 1_2	89.01	84.9783	88.5433	65.44	94.7433
Gardening compost 3_4	126.681	119.385	122.667	89.8878	127.458
Gardening compost 5	113.621	104.401	107.323	82.1957	120.37
Gardening compost ctrl	0	0	0	0	0
Sandy gravel 1_2	29.9302	72.8629	76.0764	96.0985	109.356
Sandy gravel 3_4	42.0977	133.644	127.004	73.5911	97.1264
Sandy gravel 5	37.3188	102.077	99.3057	115.357	150.864
Sandy gravel ctrl	0	0	0	0	0
Week 2
Fine peat-sand 1	95.5063	110.722	119.338	102.093	207.224
Fine peat-sand 2	65.3699	80.8493	85.1963	75.3242	179.712
Fine peat-sand 3	82.026	100.697	109.351	117.351	202.944
Fine peat-sand 4	85.3128	107.847	119.993	146.635	181.201
Fine peat-sand 5	90.6431	98.4686	110.998	110.004	134.843
Coarse peat-sand 1	80.881	102.245	104.236	77.5455	192.134
Coarse peat-sand 2	82.7123	105.523	106.413	77.9954	193.785
Coarse peat-sand 3	66.1068	58.1615	86.3307	72.2865	131.896
Coarse peat-sand 4	63.679	53.5802	86.5185	72.5185	187.586
Coarse peat-sand 5	71.3395	86.7577	102.792	77.4105	134.194
Gardening compost 1	68.7733	107.867	93.44	166.14	218.127
Gardening compost 2	84.9375	93.0583	96.4625	155.9	223.167
Gardening compost 3	67.8016	100.081	110.178	103.092	205.987
Gardening compost 4	77.5301	108.014	118.108	144.489	205.872
Gardening compost 5	97.7197	118.028	120.376	120.576	187.035
Sandy gravel 1	3.52344	44.8242	54.8021	95.974	145.125
Sandy gravel 2	1.86962	30.7769	52.4476	51.7339	171.274
Sandy gravel 3	2.57283	63.6064	82.5896	76.6695	123.77
Sandy gravel 4	2.03457	68.6296	77.5938	57.6938	102.158
Sandy gravel 5	1.15718	30.5989	74.1694	57.4715	101.558
Week 4
Fine peat-sand 1	41.1023	108.299	128.695	93.1705	186.905
Fine peat-sand 2	31.9817	74.8476	83.4634	85.7154	132.037
Fine peat-sand 3	29.9346	100.427	103.667	87.6076	141.62
Fine peat-sand 4	36.9702	109.73	119.079	116.429	189.813
Fine peat-sand 5	28.2532	89.3312	103.245	113.253	141.303
Coarse peat-sand 1	3.76913	76.1079	115.102	66.1175	161.456
Coarse peat-sand 2	3.52294	25.5321	94.6544	54.3303	159.538
Coarse peat-sand 3	2.33025	23.9136	73.5525	71.2099	150.963
Coarse peat-sand 4	13.5467	38.3133	89.5867	68.0613	158.496
Coarse peat-sand 5	1.48485	22.8061	84.4288	82.0909	148.061
Gardening compost 1	30.1122	104.269	99.8301	115.788	187.199
Gardening compost 2	29.8077	98	102.997	131.538	192.263
Gardening compost 3	26.7545	107	99.8333	96.4909	144.152
Gardening compost 4	33.1264	117.299	112.494	139.247	182.902
Gardening compost 5	36.703	116.664	119.164	122.776	178.048
Sandy gravel 1	1.13757	21.5079	35.1653	91.3307	106.566
Sandy gravel 2	1.92035	33.8097	58.4617	50.174	107.743
Sandy gravel 3	0.392063	44.4444	88.3317	115.054	144.705
Sandy gravel 4	2.09855	32.9377	54.0406	76.4812	119.426
Sandy gravel 5	1.47068	45.0586	77.338	106.864	175.207
Week 8
Fine peat-sand 1	20.5971	107.498	125.209	97.9773	135.398
Fine peat-sand 2	9.29773	81.6699	81.5696	87.3398	94.9029
Fine peat-sand 3	11.3714	100.011	103.424	87	145.073
Fine peat-sand 4	24.647	106.998	101.556	108.545	104.609
Fine peat-sand 5	10.9877	80.3133	96.4552	91.1049	122.691
Coarse peat-sand 1	1.76886	53.983	85.0766	90.2774	134.684
Coarse peat-sand 2	2.06162	9.36695	36.3137	62.5602	123.087
Coarse peat-sand 3	1.15702	7.1708	21.1887	64.9311	122.38
Coarse peat-sand 4	0.984252	6.28346	22.752	48.9895	106.937
Coarse peat-sand 5	1.30455	6.31667	23.2773	51.097	112.373
Gardening compost 1	9.38333	82.6583	69.5833	103.594	128
Gardening compost 2	8.26302	87.3437	83.0391	135.141	150.104
Gardening compost 3	11.068	100.274	81.3794	88.8333	120.956
Gardening compost 4	10.6016	89.5443	95.737	126.917	157.672
Gardening compost 5	8.7328	89.5873	84.4444	99.0529	126.413
Sandy gravel 1	0.761658	25.5112	37.228	87.2176	108.081
Sandy gravel 2	0.733156	4.4016	11.4645	55.2199	104.92
Sandy gravel 3	1.02618	3.38918	17.8709	43.3543	117.609
Sandy gravel 4	0.330556	8.76296	13.3907	61.0722	109.039
Sandy gravel 5	0.647147	22.7267	29.518	124.733	141.033
Week 12
Fine peat-sand 1	8.051	81.6032	97.6119	91.8259	107.913
Fine peat-sand 2	4.74133	55.0427	71.8467	77.408	105.699
Fine peat-sand 3	4.97804	73.1473	89.186	79.3773	100.465
Fine peat-sand 4	6.96468	74.6015	92.8477	84.4194	101.3
Fine peat-sand 5	4.80826	75.6475	87.7906	86.0354	99.9823
Fine peat-sand ctrl	0.488215	0.488215	0.488215	0.488215	0.488215
Coarse peat-sand 1	1.01375	16.7491	31.7268	94.8385	131.04
Coarse peat-sand 2	1.18882	8.30802	20.6835	60.0148	118.36
Coarse peat-sand 3	0.694859	4.46352	14.2048	48.0498	113.829
Coarse peat-sand 4	0.449588	4.143	12.3107	38.9568	117.372
Coarse peat-sand 5	0.619938	3.32243	13.7134	51.9688	118.651
Coarse peat-sand ctrl	0.294203	0.294203	0.294203	0.294203	0.294203
Gardening compost 1	3.26404	75.4401	57.6479	94.9513	120.599
Gardening compost 2	5.91077	71.404	50.1936	93.4579	131.805
Gardening compost 3	6.06863	81.8784	68.202	90.1765	129.412
Gardening compost 4	4.06629	84.0777	64.7386	95.3258	136.572
Gardening compost 5	5.50803	92.751	76.3815	101.831	117.916
Gardening compost ctrl	0	0	0	0	0
Sandy gravel 1	0.115183	2.30541	2.51134	87.815	97.1396
Sandy gravel 2	0.258182	2.16	2.52364	47.2206	88.4158
Sandy gravel 3	0.375	0.690586	1.46528	15.8241	90.5185
Sandy gravel 4	0.22534	1.13946	0.89966	74.6293	98.6548
Sandy gravel 5	0.406609	5.39943	6.49138	114.299	146.333
Sandy gravel ctrl	0.224	0.224	0.224	0.224	0.224

## Sheet: Recovery for surrogate standard
Recovery % for standars
	Naphthalene-D8	Acenaphthene-D10	Phenanthrene-D10	Chrysene-D12	Perylene-D12
Week 0
Fine peat-sand 1	65.7765	67.5083	87.7809	71.2454	70.5567
Fine peat-sand 2	73.3111	76.2544	78.7402	80.3762	95.3425
Fine peat-sand 3	56.1136	60.0925	78.2534	60.4924	67.2812
Fine peat-sand 4	63.8284	57.5971	61.4571	59.1874	60.7478
Fine peat-sand 5	66.1376	66.569	67.8012	70.0771	83.5701
Fine peat-sand ctrl	55.0479	55.4262	56.8117	57.5523	59.2962
Coarse peat-sand 1	66.3812	65.7354	66.5801	73.346	78.0762
Coarse peat-sand 2	66.3812	65.7354	66.5801	73.346	78.0762
Coarse peat-sand 3	63.3995	56.3126	70.0894	82.6071	90.3628
Coarse peat-sand 4	63.3995	56.3126	70.0894	82.6071	90.3628
Coarse peat-sand 5	58.9849	61.5839	62.4103	63.5526	68.458
Coarse peat-sand ctrl	80.2794	74.1427	76.9823	79.0826	81.5927
Gardening compost 1	56.9103	56.6926	57.3477	60.1793	57.1429
Gardening compost 2	68.6271	73.3192	92.0598	94.5358	84.7925
Gardening compost 3	74.228	69.8861	78.0001	82.0345	89.7706
Gardening compost 4	65.7138	67.0264	66.769	69.4686	74.6798
Gardening compost 5	64.6831	65.1317	65.6297	69.5338	68.8753
Gardening compost ctrl	62.6684	54.6582	57.5109	60.2301	58.524
Sandy gravel 1	58.2004	55.0555	70.609	82.4946	76.1963
Sandy gravel 2	58.2004	55.0555	70.609	82.4946	76.1963
Sandy gravel 3	59.2452	59.8032	61.2576	69.7496	59.3542
Sandy gravel 4	59.2452	59.8032	61.2576	69.7496	59.3542
Sandy gravel 5	57.5275	64.1993	67.3923	73.4727	87.6847
Sandy gravel ctrl	69.2065	88.269	94.7867	117.288	108.761
Week 2
Fine peat-sand 1	73.4322	71.0429	62.0155	69.735	83.3333
Fine peat-sand 2	51.8054	67.5083	87.7809	71.2454	70.5567
Fine peat-sand 3	52.3177	55.4109	61.4213	51.4854	75.0413
Fine peat-sand 4	52.8513	60.0925	78.2534	60.4924	67.2812
Fine peat-sand 5	49.8878	50.4083	67.39	52.1322	69.4107
Coarse peat-sand 1	40.1188	47.5172	66.212	53.3931	64.4371
Coarse peat-sand 2	51.1535	54.8306	67.39	52.1322	74.5879
Coarse peat-sand 3	50.9528	51.9615	66.212	53.3931	68.8753
Coarse peat-sand 4	50.7692	56.3476	68.9988	55.4754	67.1908
Coarse peat-sand 5	58.3976	66.9254	81.3537	63.8121	70.7714
Gardening compost 1	52.843	55.417	70.4077	63.1114	73.8825
Gardening compost 2	66.1201	66.9254	81.3537	63.8121	70.7714
Gardening compost 3	59.891	56.3476	68.9988	55.4754	72.0305
Gardening compost 4	56.9346	56.4334	68.4369	54.0044	71.7721
Gardening compost 5	59.3296	57.8168	68.1199	52.579	69.3914
Sandy gravel 1	59.8301	56.3222	67.0017	53.3134	68.1338
Sandy gravel 2	66.5513	62.4961	59.6552	48.7329	68.8563
Sandy gravel 3	72.5163	67.5584	65.9935	54.057	77.7605
Sandy gravel 4	49.9276	50.1832	51.4933	63.6375	81.1096
Sandy gravel 5	54.5852	51.0621	50.477	52.304	67.1141
Blank sample	81.9403	79.1202	69.0274	59.7051	73.3407
Week 4
Fine peat-sand 1	81.9403	79.1202	69.0274	59.7051	56.7054
Fine peat-sand 2	97.7517	93.3794	64.9899	95.7213	63.8162
Fine peat-sand 3	109.17	106.61	94.4376	82.85	78.6411
Fine peat-sand 4	93.1966	87.1384	91.9963	70.8065	58.1666
Fine peat-sand 5	93.9408	100.18	90.5551	71.0985	76.8167
Coarse peat-sand 1	110.791	68.7521	70.9069	72.8385	79.8786
Coarse peat-sand 2	66.1201	66.9254	81.3537	63.8121	70.7714
Coarse peat-sand 3	103.125	114.325	80.0448	76.7695	67.1908
Coarse peat-sand 4	104.559	114.679	68.4369	54.0044	77.3216
Coarse peat-sand 5	101.471	88.5269	85.6164	66.5823	69.3914
Gardening compost 1	73.4322	71.0429	62.0155	69.735	83.3333
Gardening compost 2	63.6821	67.5083	87.7809	90.6125	89.5015
Gardening compost 3	76.2544	77.238	97.2668	87.5427	83.8504
Gardening compost 4	113.366	103.724	78.2534	60.4924	67.2812
Gardening compost 5	62.3092	65.6254	77.8877	89.4294	96.0892
Sandy gravel 1	59.8301	56.3222	67.0017	102.491	85.6384
Sandy gravel 2	66.5513	62.4961	59.6552	67.4764	73.9481
Sandy gravel 3	72.5163	67.5584	65.9935	54.057	59.312
Sandy gravel 4	69.7885	83.1463	98.8142	93.3358	88.269
Sandy gravel 5	69.8324	64.1684	72.4061	109.661	112.36
Blank sample	118.399	106.519	104.286	81.6593	78.9827
Week 8
Fine peat-sand 1	88.7469	86.1475	56.9282	59.2663	59.5983
Fine peat-sand 2	87.4432	102.501	121.448	82.6856	87.7886
Fine peat-sand 3	125.802	107.98	69.7204	110.169	97.2763
Fine peat-sand 4	79.8276	69.8227	49.0461	64.6454	65.4836
Fine peat-sand 5	104.112	96.7024	80.9389	108.684	86.4528
Coarse peat-sand 1	84.5952	96.0707	64.7249	104.646	87.5197
Coarse peat-sand 2	95.0841	87.9507	93.4754	116.469	93.9144
Coarse peat-sand 3	114.233	106.86	91.0249	128.617	100.06
Coarse peat-sand 4	98.5222	90.7359	73.524	105.352	102.87
Coarse peat-sand 5	129.702	115.38	115.794	119.962	109.314
Gardening compost 1	97.5705	99.5025	85.5213	83.3333	84.2744
Gardening compost 2	104.341	91.7347	90.7688	84.1893	92.6441
Gardening compost 3	114.6	106.474	104.069	87.5733	97.9624
Gardening compost 4	92.1489	106.372	65.7246	65.0703	73.1154
Gardening compost 5	85.918	87.4967	84.9113	70.6015	71.9632
Sandy gravel 1	81.0636	72.1241	67.5721	93.7647	95.9969
Sandy gravel 2	87.0171	87.3897	82.7335	79.3651	93.5804
Sandy gravel 3	113.636	111.869	91.954	86.6101	98.824
Sandy gravel 4	108.566	119.775	106.146	85.2733	102.354
Sandy gravel 5	114.181	119.603	97.6467	90.5715	69.6961
Blank sample	113.045	94.038	109.111	77.4234	78.6225
Week 12
Fine peat-sand 1	80.0833	75.3693	68.6295	66.6178	72.5321
Fine peat-sand 2	74.2776	91.4997	70.7714	74.9681	73.1422
Fine peat-sand 3	86.0289	82.7061	78.3822	81.5661	84.2034
Fine peat-sand 4	109.806	97.6372	107.666	110.351	99.5619
Fine peat-sand 5	79.4849	67.7599	70.2938	70.922	75.1315
Fine peat-sand ctrl	72.427	66.8271	62.135	55.1785	61.0799
Coarse peat-sand 1	87.3973	87.3286	68.653	67.2495	81.606
Coarse peat-sand 2	94.3129	88.6211	80.5023	82.5083	86.6176
Coarse peat-sand 3	81.9471	67.4218	76.5228	71.2099	71.7875
Coarse peat-sand 4	83.5352	80.7428	63.0239	59.952	66.769
Coarse peat-sand 5	88.6603	93.0492	74.1125	77.4833	85.8074
Coarse peat-sand ctrl	70.9874	65.1975	56.4175	48.2369	52.7621
Gardening compost 1	80.9782	70.6864	65.1551	70.4473	77.8392
Gardening compost 2	85.4628	83.1255	72.1293	62.7668	71.9269
Gardening compost 3	90.9008	87.1156	79.0701	67.7369	78.6473
Gardening compost 4	84.832	72.1137	71.8701	52.8961	62.3636
Gardening compost 5	100.817	101.843	87.0625	90.3179	98.4058
Gardening compost ctrl	75.7232	77.1545	73.03	60.2882	73.0034
Sandy gravel 1	92.7902	107.216	97.7326	95.6206	109.613
Sandy gravel 2	72.7167	71.8339	66.3922	63.7186	69.8129
Sandy gravel 3	84.7745	82.4946	77.2499	81.1162	85.2152
Sandy gravel 4	65.2486	71.8339	61.0575	70.9572	72.1397
Sandy gravel 5	89.3176	86.3036	70.0525	72.9235	72.6744
Sandy gravel ctrl	152.672	142.939	110.571	85.8811	102.145
Blank sample	109.685	104.822	78.3822	77.101	83.1255
Average	77.0318
Standard Deviation	17.3591
