# Supplementary material for: Half-lives of PAHs and temporal microbiota changes in commonly used urban landscaping materials
Source: PeerJ. 2018 Mar 19;6:e4508. doi: 10.7717/peerj.4508 (PMC5863720; doi:10.7717/peerj.4508)
Supplement: Table S6 — Multivariate analysis of variance (MANOVA) with Bonferroni correction was used to compare half-life of PAHs (log transformed) in different landscaping materials. [file peerj-06-4508-s006.xlsx]

## Sheet: Sheet1
Multiple Comparisons
Bonferroni
Dependent Variable	(I) Material	(J) Material	Mean Difference (I-J)	Std. Error	Signifigance	95% Confidence Interval
					p	Lower Bound	Upper Bound
Log_phenanthrene	Coarse peat-sand	Fine peat-sand	-0.2697*	0.02146	0.000	-0.3374	-0.2021
		Gardening compost	-0.2258*	0.02146	0.000	-0.2935	-0.1582
		Sandy gravel	0.005	0.02146	1.000	-0.0627	0.0726
	Fine peat-sand	Coarse peat-sand	0.2697*	0.02146	0.000	0.2021	0.3374
		Gardening compost	0.0439	0.02146	0.380	-0.0238	0.1116
		Sandy gravel	0.2747*	0.02146	0.000	0.207	0.3423
	Gardening compost	Coarse peat-sand	0.2258*	0.02146	0.000	0.1582	0.2935
		Fine peat-sand	-0.0439	0.02146	0.380	-0.1116	0.0238
		Sandy gravel	0.2308*	0.02146	0.000	0.1631	0.2984
	Sandy gravel	Coarse peat-sand	-0.005	0.02146	1.000	-0.0726	0.0627
		Fine peat-sand	-0.2747*	0.02146	0.000	-0.3423	-0.207
		Gardening compost	-0.2308*	0.02146	0.000	-0.2984	-0.1631
Log_fluoranthene	Coarse peat-sand	Fine peat-sand	-1.2075*	0.06896	0.000	-1.4249	-0.9901
		Gardening compost	-1.1755*	0.06896	0.000	-1.3929	-0.9581
		Sandy gravel	-0.0827	0.06896	1.000	-0.3001	0.1347
	Fine peat-sand	Coarse peat-sand	1.2075*	0.06896	0.000	0.9901	857957
		Gardening compost	0.032	0.06896	1.000	-0.1854	0.2494
		Sandy gravel	1.1249*	0.06896	0.000	0.9075	556266
	Gardening compost	Coarse peat-sand	1.1755*	0.06896	0.000	0.9581	741079
		Fine peat-sand	-0.032	0.06896	1.000	-0.2494	0.1854
		Sandy gravel	1.0929*	0.06896	0.000	0.8755	439388
	Sandy gravel	Coarse peat-sand	0.0827	0.06896	1.000	-0.1347	0.3001
		Fine peat-sand	-1.1249*	0.06896	0.000	-1.3423	-0.9075
		Gardening compost	-1.0929*	0.06896	0.000	-1.3103	-0.8755
Log_pyrene	Coarse peat-sand	Fine peat-sand	-1.1138*	0.08297	0.000	-1.3754	-0.8523
		Gardening compost	-0.5449*	0.08297	0.000	-0.8065	-0.2833
		Sandy gravel	0.1951	0.08297	0.220	-0.0665	0.4567
	Fine peat-sand	Coarse peat-sand	1.1138*	0.08297	0.000	0.8523	677162
		Gardening compost	0.5689*	0.08297	0.000	0.3073	0.8305
		Sandy gravel	1.3089*	0.08297	0.000	1.0474	1389750
	Gardening compost	Coarse peat-sand	0.5449*	0.08297	0.000	0.2833	0.8065
		Fine peat-sand	-0.5689*	0.08297	0.000	-0.8305	-0.3073
		Sandy gravel	0.7400*	0.08297	0.000	0.4784	1.0016
	Sandy gravel	Coarse peat-sand	-0.1951	0.08297	0.220	-0.4567	0.0665
		Fine peat-sand	-1.3089*	0.08297	0.000	-1.5705	-1.0474
		Gardening compost	-0.7400*	0.08297	0.000	-1.0016	-0.4784
Log_chrysene	Coarse peat-sand	Fine peat-sand	-0.3451	0.12326	0.096	-0.7337	0.0436
		Gardening compost	-0.3788	0.12326	0.058	-0.7674	0.0098
		Sandy gravel	-0.8858*	0.12326	0.000	-1.2745	-0.4972
	Fine peat-sand	Coarse peat-sand	0.3451	0.12326	0.096	-0.0436	0.7337
		Gardening compost	-0.0338	0.12326	1.000	-0.4224	0.3548
		Sandy gravel	-0.5408*	0.12326	0.005	-0.9294	-0.1522
	Gardening compost	Coarse peat-sand	0.3788	0.12326	0.058	-0.0098	0.7674
		Fine peat-sand	0.0338	0.12326	1.000	-0.3548	0.4224
		Sandy gravel	-0.5070*	0.12326	0.009	-0.8956	-0.1184
	Sandy gravel	Coarse peat-sand	0.8858*	0.12326	0.000	0.4972	308632
		Fine peat-sand	0.5408*	0.12326	0.005	0.1522	0.9294
		Gardening compost	0.5070*	0.12326	0.009	0.1184	0.8956
Log_benzoBfluoranthene	Coarse peat-sand	Fine peat-sand	0.3752	0.12567	0.068	-0.021	0.7714
		Gardening compost	0.2434	0.12567	0.460	-0.1528	0.6396
		Sandy gravel	-0.1359	0.12567	1.000	-0.5321	0.2603
	Fine peat-sand	Coarse peat-sand	-0.3752	0.12567	0.068	-0.7714	0.021
		Gardening compost	-0.1318	0.12567	1.000	-0.528	0.2644
		Sandy gravel	-0.5111*	0.12567	0.009	-0.9073	-0.1149
	Gardening compost	Coarse peat-sand	-0.2434	0.12567	0.460	-0.6396	0.1528
		Fine peat-sand	0.1318	0.12567	1.000	-0.2644	0.528
		Sandy gravel	-0.3793	0.12567	0.064	-0.7755	0.0169
	Sandy gravel	Coarse peat-sand	0.1359	0.12567	1.000	-0.2603	0.5321
		Fine peat-sand	0.5111*	0.12567	0.009	0.1149	0.9073
		Gardening compost	0.3793	0.12567	0.064	-0.0169	0.7755
Based on observed means.
The error term is Mean Square(Error) =0 .032.
*. The mean difference is significant at the 0.05 level.
