# Supplementary material for: Half-lives of PAHs and temporal microbiota changes in commonly used urban landscaping materials
Source: PeerJ. 2018 Mar 19;6:e4508. doi: 10.7717/peerj.4508 (PMC5863720; doi:10.7717/peerj.4508)
Supplement: Table S7 — The linear regression models were used to estimate the relationship between half-lives and properties of the landscaping materials, and between half-lives and bacteria relative abundances and diversities. [file peerj-06-4508-s007.xlsx]

## Sheet: Om_regression
ANOVAa
Model		Sum of Squares	df	Mean Square	F	Sig.
1	Regression	0.133802946648244	1	0.133802946648244	13.3789534281334	0.002b
	Residual	0.180018044954388	18	0.010001002497466
	Total	0.313820991602631	19
a. Dependent Variable: Log_phenanthrene
b. Predictors: (Constant), Organic_matter
ANOVAa
Model		Sum of Squares	df	Mean Square	F	Sig.
1	Regression	3.51244742389839	1	3.51244742389839	20.9709759272203	0.000b
	Residual	2.84734513136163	17	0.167490890080096
	Total	6.35979255526001	18
a. Dependent Variable: Log_fluoranthene
b. Predictors: (Constant), Organic_matter
ANOVAa
Model		Sum of Squares	df	Mean Square	F	Sig.
1	Regression	0.927665088604302	1	0.927665088604302	4.21183486876482	0.055b
	Residual	3.96453614995936	18	0.220252008331075
	Total	4.89220123856366	19
a. Dependent Variable: Log_pyrene
b. Predictors: (Constant), Organic_matter
ANOVAa
Model		Sum of Squares	df	Mean Square	F	Sig.
1	Regression	0.0106778554927167	1	0.0106778554927167	0.081772397535581	0.779b
	Residual	1.95870290241959	15	0.130580193494639
	Total	1.9693807579123	16
a. Dependent Variable: Log_chrysene
b. Predictors: (Constant), Organic_matter
ANOVAa
Model		Sum of Squares	df	Mean Square	F	Sig.
1	Regression	0.177512284341482	1	0.177512284341482	3.10911951805051	0.095b
	Residual	1.02769324228171	18	0.0570940690156504
	Total	1.20520552662319	19
a. Dependent Variable: Log_benzoBfluoranthene
b. Predictors: (Constant), Organic_matter

## Sheet: pH_regression
ANOVAa
Model		Sum of Squares	df	Mean Square	F	Sig.
1	Regression	0.00026002175080353	1	0.00026002175080353	0.014926575576914	0.904 b
	Residual	0.313560969851828	18	0.0174200538806571
	Total	0.313820991602631	19
a. Dependent Variable: Log_phenanthrene
b. Predictors: (Constant), pH
ANOVAa
Model		Sum of Squares	df	Mean Square	F	Sig.
1	Regression	0.0905530671954864	1	0.0905530671954864	0.245548466485291	0.627 b
	Residual	6.26923948806452	17	0.36877879341556
	Total	6.35979255526001	18
a. Dependent Variable: Log_fluoranthene
b. Predictors: (Constant), pH
ANOVAa
Model		Sum of Squares	df	Mean Square	F	Sig.
1	Regression	0.265646486062308	1	0.265646486062308	1.03351997434729	0.323 b
	Residual	4.62655475250135	18	0.257030819583408
	Total	4.89220123856366	19
a. Dependent Variable: Log_pyrene
b. Predictors: (Constant), pH
ANOVAa
Model		Sum of Squares	df	Mean Square	F	Sig.
1	Regression	0.393943705290738	1	0.393943705290738	3.75080398771128	0.072 b
	Residual	1.57543705262156	15	0.105029136841438
	Total	1.9693807579123	16
a. Dependent Variable: Log_chrysene
b. Predictors: (Constant), pH
ANOVAa
Model		Sum of Squares	df	Mean Square	F	Sig.
1	Regression	0.000445271517961698	1	0.000445271517961698	0.00665268238169956	0.936 b
	Residual	1.20476025510523	18	0.0669311252836238
	Total	1.20520552662319	19
a. Dependent Variable: Log_benzoBfluoranthene
b. Predictors: (Constant), pH

## Sheet: Bacteria_regression
OTU shannon diversity X half-lives
ANOVAa
Model		Sum of Squares	df	Mean Square	F	Sig.
1	Regression	0.828084715021137	1	0.828084715021137	5.8713180149641	0.031 b
	Residual	1.83350676421172	13	0.14103898186244
	Total	2.66159147923285	14
a. Dependent Variable: Log_pyrene
b. Predictors: (Constant), otu_shannon
ANOVAa
Model		Sum of Squares	df	Mean Square	F	Sig.
1	Regression	0.0771357494743082	1	0.0771357494743082	2.09503103449022	0.176 b
	Residual	0.405002708909203	11	0.0368184280826548
	Total	0.482138458383511	12
a. Dependent Variable: Log_chrysene
b. Predictors: (Constant), otu_shannon
ANOVAa
Model		Sum of Squares	df	Mean Square	F	Sig.
1	Regression	0.0162950282947698	1	0.0162950282947698	0.242630070476102	0.631 b
	Residual	0.873079612169804	13	0.067159970166908
	Total	0.889374640464574	14
a. Dependent Variable: Log_benzoBfluoranthene
b. Predictors: (Constant), otu_shannon
OTU Chao richness X half-lives
ANOVAa
Model		Sum of Squares	df	Mean Square	F	Sig.
1	Regression	0.166234206160797	1	0.166234206160797	0.866026161227758	0.369 b
	Residual	2.49535727307206	13	0.191950559467081
	Total	2.66159147923285	14
a. Dependent Variable: Log_pyrene
b. Predictors: (Constant), otu_richness_chao
ANOVAa
Model		Sum of Squares	df	Mean Square	F	Sig.
1	Regression	0.0000542929422269744	1	0.0000542929422269744	0.00123883422711107	0.973 b
	Residual	0.482084165441285	11	0.043825833221935
	Total	0.482138458383511	12
a. Dependent Variable: Log_chrysene
b. Predictors: (Constant), otu_richness_chao
ANOVAa
Model		Sum of Squares	df	Mean Square	F	Sig.
1	Regression	1.00523597446056E-07	1	1.00523597446056E-07	1.46935482024826E-06	0.999 b
	Residual	0.889374539940976	13	0.0684134261493059
	Total	0.889374640464574	14
a. Dependent Variable: Log_benzoBfluoranthene
b. Predictors: (Constant), otu_richness_chao
Actinobacteria shannon diversity X half-lives
ANOVAa
Model		Sum of Squares	df	Mean Square	F	Sig.
1	Regression	0.0962314920853924	1	0.0962314920853924	0.487654521539941	0.497 b
	Residual	2.56535998714746	13	0.197335383626728
	Total	2.66159147923285	14
a. Dependent Variable: Log_pyrene
b. Predictors: (Constant), actinobacteria_shannon
ANOVAa
Model		Sum of Squares	df	Mean Square	F	Sig.
1	Regression	0.00117499244905972	1	0.00117499244905972	0.0268729703087641	0.873 b
	Residual	0.480963465934452	11	0.0437239514485865
	Total	0.482138458383511	12
a. Dependent Variable: Log_chrysene
b. Predictors: (Constant), actinobacteria_shannon
ANOVAa
Model		Sum of Squares	df	Mean Square	F	Sig.
1	Regression	0.0261076313004903	1	0.0261076313004903	0.393156698105515	0.542 b
	Residual	0.863267009164083	13	0.0664051545510833
	Total	0.889374640464574	14
a. Dependent Variable: Log_benzoBfluoranthene
b. Predictors: (Constant), actinobacteria_shannon
Bacteroidetes diversity X half-lives
ANOVAa
Model		Sum of Squares	df	Mean Square	F	Sig.
1	Regression	0.27957176838645	1	0.27957176838645	5.96001290816851	0.030 b
	Residual	0.609802872078124	13	0.0469079132367788
	Total	0.889374640464574	14
a. Dependent Variable: Log_benzoBfluoranthene
b. Predictors: (Constant), bacteroidetes_shannon
ANOVAa
Model		Sum of Squares	df	Mean Square	F	Sig.
1	Regression	0.0661234480031928	1	0.0661234480031928	1.7483934711158	0.213 b
	Residual	0.416015010380319	11	0.0378195463982108
	Total	0.482138458383511	12
a. Dependent Variable: Log_chrysene
b. Predictors: (Constant), bacteroidetes_shannon
ANOVAa
Model		Sum of Squares	df	Mean Square	F	Sig.
1	Regression	1.55262348896076	1	1.55262348896076	18.2008006845513	0.001 b
	Residual	1.1089679902721	13	0.0853052300209305
	Total	2.66159147923285	14
a. Dependent Variable: Log_pyrene
b. Predictors: (Constant), bacteroidetes_shannon
Proteobacteria diversity X half-lives
ANOVAa
Model		Sum of Squares	df	Mean Square	F	Sig.
1	Regression	0.0000102541768360886	1	0.0000102541768360886	0.0000500846254906476	0.994 b
	Residual	2.66158122505602	13	0.204737017312001
	Total	2.66159147923285	14
a. Dependent Variable: Log_pyrene
b. Predictors: (Constant), proteobacteria_shannon
ANOVAa
Model		Sum of Squares	df	Mean Square	F	Sig.
1	Regression	0.00420548642924917	1	0.00420548642924917	0.096792549240917	0.762 b
	Residual	0.477932971954262	11	0.043448451995842
	Total	0.482138458383511	12
a. Dependent Variable: Log_chrysene
b. Predictors: (Constant), proteobacteria_shannon
ANOVAa
Model		Sum of Squares	df	Mean Square	F	Sig.
1	Regression	0.13190270849817	1	0.13190270849817	2.26376072579316	0.156 b
	Residual	0.757471931966403	13	0.0582670716897233
	Total	0.889374640464574	14
a. Dependent Variable: Log_benzoBfluoranthene
b. Predictors: (Constant), proteobacteria_shannon
Alphaproteobacteria diversity X half-lives
ANOVAa
Model		Sum of Squares	df	Mean Square	F	Sig.
1	Regression	0.0747352848416396	1	0.0747352848416396	0.375575072571809	0.551 b
	Residual	2.58685619439121	13	0.198988938030093
	Total	2.66159147923285	14
a. Dependent Variable: Log_pyrene
b. Predictors: (Constant), alphaproteobacteria_shannon
ANOVAa
Model		Sum of Squares	df	Mean Square	F	Sig.
1	Regression	0.0153056530794036	1	0.0153056530794036	0.360647713615079	0.560 b
	Residual	0.466832805304108	11	0.0424393459367371
	Total	0.482138458383511	12
a. Dependent Variable: Log_chrysene
b. Predictors: (Constant), alphaproteobacteria_shannon
ANOVAa
Model		Sum of Squares	df	Mean Square	F	Sig.
1	Regression	0.00352134632765544	1	0.00352134632765544	0.0516761664290271	0.824 b
	Residual	0.885853294136918	13	0.0681425610874553
	Total	0.889374640464574	14
a. Dependent Variable: Log_benzoBfluoranthene
b. Predictors: (Constant), alphaproteobacteria_shannon
Betaproteobacteria diversity x Half-lives
ANOVAa
Model		Sum of Squares	df	Mean Square	F	Sig.
1	Regression	0.95923430449687	1	0.95923430449687	7.32516427429119	0.018 b
	Residual	1.70235717473598	13	0.130950551902768
	Total	2.66159147923285	14
a. Dependent Variable: Log_pyrene
b. Predictors: (Constant), betaproteobacteria_shannon
ANOVAa
Model		Sum of Squares	df	Mean Square	F	Sig.
1	Regression	0.0258437295772018	1	0.0258437295772018	0.623020621108014	0.447 b
	Residual	0.45629472880631	11	0.0414813389823918
	Total	0.482138458383511	12
a. Dependent Variable: Log_chrysene
b. Predictors: (Constant), betaproteobacteria_shannon
ANOVAa
Model		Sum of Squares	df	Mean Square	F	Sig.
1	Regression	0.170841317519863	1	0.170841317519863	3.09093128577019	0.102 b
	Residual	0.718533322944711	13	0.05527179407267
	Total	0.889374640464574	14
a. Dependent Variable: Log_benzoBfluoranthene
b. Predictors: (Constant), betaproteobacteria_shannon
Deltaproteobacteria diversity x half-lives
ANOVAa
Model		Sum of Squares	df	Mean Square	F	Sig.
1	Regression	0.444348251619674	1	0.444348251619674	2.60527451346603	0.131 b
	Residual	2.21724322761318	13	0.17055717135486
	Total	2.66159147923285	14
a. Dependent Variable: Log_pyrene
b. Predictors: (Constant), deltaproteobacteria_shannon
ANOVAa
Model		Sum of Squares	df	Mean Square	F	Sig.
1	Regression	0.00319220044799379	1	0.00319220044799379	0.0733155429155879	0.792 b
	Residual	0.478946257935518	11	0.0435405689032289
	Total	0.482138458383511	12
a. Dependent Variable: Log_chrysene
b. Predictors: (Constant), deltaproteobacteria_shannon
ANOVAa
Model		Sum of Squares	df	Mean Square	F	Sig.
1	Regression	0.0137296240659697	1	0.0137296240659697	0.203832728463056	0.659 b
	Residual	0.875645016398604	13	0.0673573089537388
	Total	0.889374640464574	14
a. Dependent Variable: Log_benzoBfluoranthene
b. Predictors: (Constant), deltaproteobacteria_shannon
Gammaproteobacteria diversity x half-lives
ANOVAa
Model		Sum of Squares	df	Mean Square	F	Sig.
1	Regression	0.0300127906217726	1	0.0300127906217726	0.148263200249949	0.706 b
	Residual	2.63157868861108	13	0.20242912989316
	Total	2.66159147923285	14
a. Dependent Variable: Log_pyrene
b. Predictors: (Constant), gammaproteobacteria_shannon
ANOVAa
Model		Sum of Squares	df	Mean Square	F	Sig.
1	Regression	0.0363957271443618	1	0.0363957271443618	0.898170560123352	0.364 b
	Residual	0.44574273123915	11	0.0405220664762863
	Total	0.482138458383511	12
a. Dependent Variable: Log_chrysene
b. Predictors: (Constant), gammaproteobacteria_shannon
ANOVAa
Model		Sum of Squares	df	Mean Square	F	Sig.
1	Regression	0.211797666468749	1	0.211797666468749	4.06355258481778	0.065 b
	Residual	0.677576973995825	13	0.0521213056919865
	Total	0.889374640464574	14
a. Dependent Variable: Log_benzoBfluoranthene
b. Predictors: (Constant), gammaproteobacteria_shannon
Actinobacteria abundance x half-lives
ANOVAa
Model		Sum of Squares	df	Mean Square	F	Sig.
1	Regression	1.09116200544782	1	1.09116200544782	9.0326285309921	0.010 b
	Residual	1.57042947378504	13	0.120802267214234
	Total	2.66159147923285	14
a. Dependent Variable: Log_pyrene
b. Predictors: (Constant), actinobacteria_abundance
ANOVAa
Model		Sum of Squares	df	Mean Square	F	Sig.
1	Regression	0.0373464955605285	1	0.0373464955605285	0.923603584377955	0.357 b
	Residual	0.444791962822983	11	0.0404356329839075
	Total	0.482138458383511	12
a. Dependent Variable: Log_chrysene
b. Predictors: (Constant), actinobacteria_abundance
ANOVAa
Model		Sum of Squares	df	Mean Square	F	Sig.
1	Regression	0.143643017205126	1	0.143643017205126	2.50406334587874	0.138 b
	Residual	0.745731623259448	13	0.0573639710199575
	Total	0.889374640464574	14
a. Dependent Variable: Log_benzoBfluoranthene
b. Predictors: (Constant), actinobacteria_abundance
Bacteroidetes abundance x half-lives
ANOVAa
Model		Sum of Squares	df	Mean Square	F	Sig.
1	Regression	0.10836950748752	1	0.10836950748752	0.551774821354343	0.471 b
	Residual	2.55322197174533	13	0.196401690134256
	Total	2.66159147923285	14
a. Dependent Variable: Log_pyrene
b. Predictors: (Constant), bacteroidetes_abundance
ANOVAa
Model		Sum of Squares	df	Mean Square	F	Sig.
1	Regression	0.114839619518266	1	0.114839619518266	3.43925893858973	0.091 b
	Residual	0.367298838865246	11	0.0333908035332041
	Total	0.482138458383511	12
a. Dependent Variable: Log_chrysene
b. Predictors: (Constant), bacteroidetes_abundance
ANOVAa
Model		Sum of Squares	df	Mean Square	F	Sig.
1	Regression	0.134857563886592	1	0.134857563886592	2.32353698139859	0.151 b
	Residual	0.754517076577982	13	0.0580397751213833
	Total	0.889374640464574	14
a. Dependent Variable: Log_benzoBfluoranthene
b. Predictors: (Constant), bacteroidetes_abundance
Proteobacteria abundance x Half-lives
ANOVAa
Model		Sum of Squares	df	Mean Square	F	Sig.
1	Regression	0.558452534753176	1	0.558452534753176	3.45192740158564	0.086 b
	Residual	2.10313894447968	13	0.161779918806129
	Total	2.66159147923285	14
a. Dependent Variable: Log_pyrene
b. Predictors: (Constant), proteobacteria_abundance
ANOVAa
Model		Sum of Squares	df	Mean Square	F	Sig.
1	Regression	0.166439171887382	1	0.166439171887382	5.79928738858157	0.035 b
	Residual	0.315699286496129	11	0.0286999351360118
	Total	0.482138458383511	12
a. Dependent Variable: Log_chrysene
b. Predictors: (Constant), proteobacteria_abundance
ANOVAa
Model		Sum of Squares	df	Mean Square	F	Sig.
1	Regression	0.49337413994798	1	0.49337413994798	16.1966053349849	0.001 b
	Residual	0.396000500516594	13	0.0304615769628149
	Total	0.889374640464574	14
a. Dependent Variable: Log_benzoBfluoranthene
b. Predictors: (Constant), proteobacteria_abundance
Alphaproteobacteria abundance x half-lives
ANOVAa
Model		Sum of Squares	df	Mean Square	F	Sig.
1	Regression	1.28009308600011	1	1.28009308600011	12.0457687099155	0.004 b
	Residual	1.38149839323274	13	0.106269107171749
	Total	2.66159147923285	14
a. Dependent Variable: Log_pyrene
b. Predictors: (Constant), alphaproteobacteria_abundance
ANOVAa
Model		Sum of Squares	df	Mean Square	F	Sig.
1	Regression	0.0179689359641589	1	0.0179689359641589	0.425832128261049	0.527 b
	Residual	0.464169522419353	11	0.0421972293108502
	Total	0.482138458383511	12
a. Dependent Variable: Log_chrysene
b. Predictors: (Constant), alphaproteobacteria_abundance
ANOVAa
Model		Sum of Squares	df	Mean Square	F	Sig.
1	Regression	0.19382943506726	1	0.19382943506726	3.62274462726692	0.079 b
	Residual	0.695545205397314	13	0.0535034773382549
	Total	0.889374640464574	14
a. Dependent Variable: Log_benzoBfluoranthene
b. Predictors: (Constant), alphaproteobacteria_abundance
Betaproteobacteria abundance x Half-lives
ANOVAa
Model		Sum of Squares	df	Mean Square	F	Sig.
1	Regression	1.17683657690198	1	1.17683657690198	10.3039737236822	0.007 b
	Residual	1.48475490233088	13	0.114211915563914
	Total	2.66159147923285	14
a. Dependent Variable: Log_pyrene
b. Predictors: (Constant), betaproteobacteria_abundance
ANOVAa
Model		Sum of Squares	df	Mean Square	F	Sig.
1	Regression	0.198632482919649	1	0.198632482919649	7.70691802365432	0.018 b
	Residual	0.283505975463862	11	0.0257732704967148
	Total	0.482138458383511	12
a. Dependent Variable: Log_chrysene
b. Predictors: (Constant), betaproteobacteria_abundance
ANOVAa
Model		Sum of Squares	df	Mean Square	F	Sig.
1	Regression	0.306565756403117	1	0.306565756403117	6.83818476730749	0.021 b
	Residual	0.582808884061456	13	0.044831452620112
	Total	0.889374640464574	14
a. Dependent Variable: Log_benzoBfluoranthene
b. Predictors: (Constant), betaproteobacteria_abundance
Deltaproteobacteria abundance x Half-lives
ANOVAa
Model		Sum of Squares	df	Mean Square	F	Sig.
1	Regression	1.18006587161307	1	1.18006587161307	10.3547696051075	0.007 b
	Residual	1.48152560761979	13	0.113963508278445
	Total	2.66159147923285	14
a. Dependent Variable: Log_pyrene
b. Predictors: (Constant), deltaproteobacteria_abundance
ANOVAa
Model		Sum of Squares	df	Mean Square	F	Sig.
1	Regression	0.0614037378772878	1	0.0614037378772878	1.60538477983819	0.231 b
	Residual	0.420734720506224	11	0.0382486109551112
	Total	0.482138458383511	12
a. Dependent Variable: Log_chrysene
b. Predictors: (Constant), deltaproteobacteria_abundance
ANOVAa
Model		Sum of Squares	df	Mean Square	F	Sig.
1	Regression	0.179316968615671	1	0.179316968615671	3.28300176791805	0.093 b
	Residual	0.710057671848903	13	0.0546198209114541
	Total	0.889374640464574	14
a. Dependent Variable: Log_benzoBfluoranthene
b. Predictors: (Constant), deltaproteobacteria_abundance
Gammaprotoebacteria abundance x Half-lives
ANOVAa
Model		Sum of Squares	df	Mean Square	F	Sig.
1	Regression	0.855811764468798	1	0.855811764468798	6.16107980787017	0.027 b
	Residual	1.80577971476405	13	0.138906131904927
	Total	2.66159147923285	14
a. Dependent Variable: Log_pyrene
b. Predictors: (Constant), gammaproteobacteria_abundance
ANOVAa
Model		Sum of Squares	df	Mean Square	F	Sig.
1	Regression	0.0862327886444113	1	0.0862327886444113	2.39592596820758	0.150 b
	Residual	0.3959056697391	11	0.0359914245217364
	Total	0.482138458383511	12
a. Dependent Variable: Log_chrysene
b. Predictors: (Constant), gammaproteobacteria_abundance
ANOVAa
Model		Sum of Squares	df	Mean Square	F	Sig.
1	Regression	0.525934234218567	1	0.525934234218567	18.8122864913744	0.001 b
	Residual	0.363440406246007	13	0.0279569543266159
	Total	0.889374640464574	14
a. Dependent Variable: Log_benzoBfluoranthene
b. Predictors: (Constant), gammaproteobacteria_abundance
